# Supplementary material
Source: Springer Nature journal article supplement (https://www.springermedizin.de/resource/supplementary/12936_2007_431_MOESM5_ESM.pdf/9547436)

OVERALL

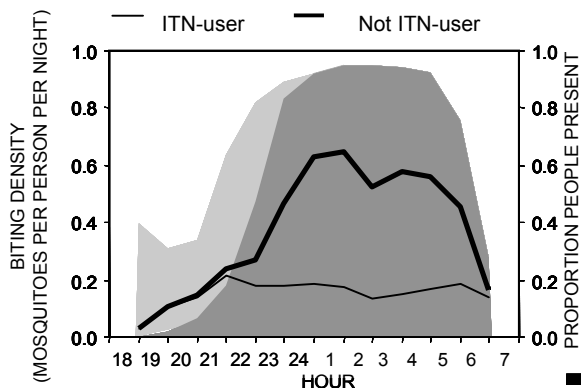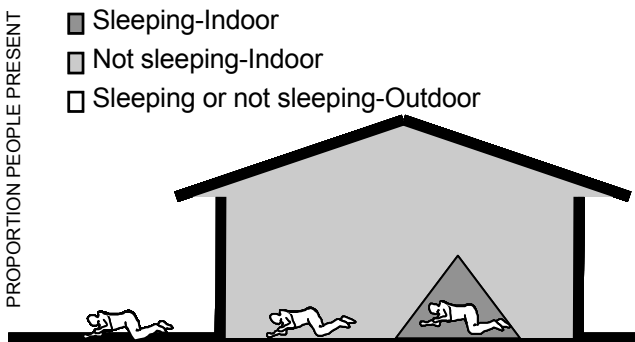

UNSCREENED

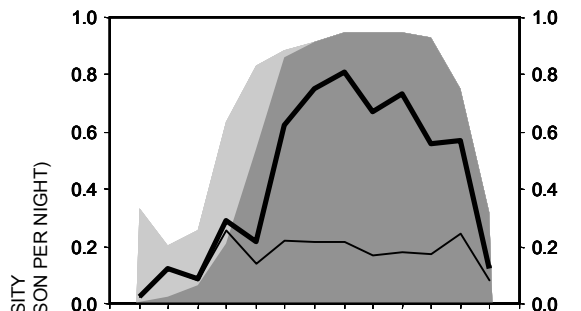

SCREENED

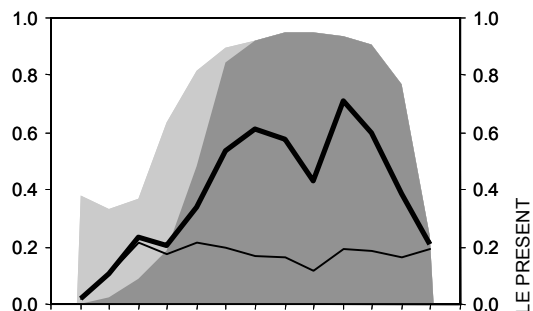

NO CEILING

CEILING

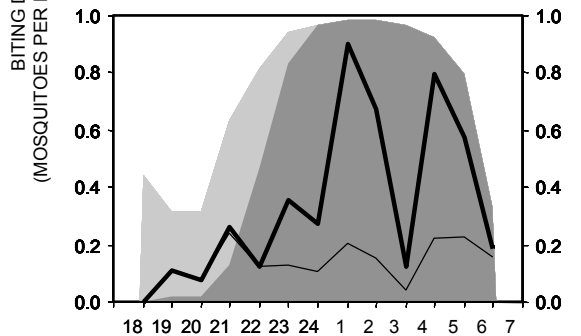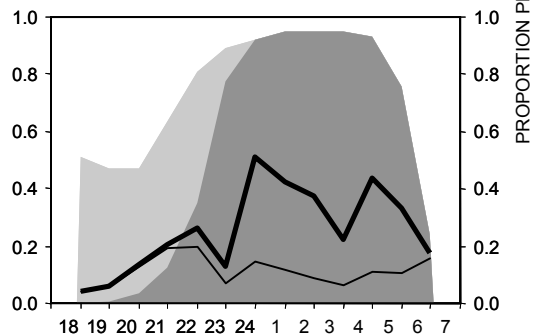

HOUR

PROPORTION PEOPLE PRESENT

Supplement: MOESM5 [file 9547436]
